# Supplementary material for: Integrated Insight into the Molecular Mechanisms of Spontaneous Abortion during Early Pregnancy in Pigs
Source: MDPI journal article supplement (doi:10.3390/ijms22126644), 2021-06-21
Supplement: s1 [file s1]

>NONHSAT211839.1  
NONCODE TRANSCRIPT ID [NONHSAT211839.1](#)  
NONCODE Gene ID [NONHSAG047182.2](#)  
Chromosome chr7  
Start Site 27114535  
End Site 27122881  
Strand +  
Exon Number 3  
CNCI Score -0.0217088  
Length 567  
Assembly hg38  
Other transcript Versions None

Query: 1008 tgcaattccaaggtgtcaagggctcggcctcctcaaaggaaggtgttaaaaatataagta 1067  
||||| ||||| ||||| ||| | ||| |||||||||||||||||||||||||  
Sbjct: 547 tgcaatcccaaggcgtcaacggcggtccttctcaaaggaaggtgttaaaaatataagta 606

Query: 1068 gtgtgtctaaactgtcaggagccaaagtgtcaccttagagcaaaaacaaagccaaggga 1127  
|| ||| ||||||||| ||||||||||||||||||||||||||||||||| |||||  
Sbjct: 607 gtatgtttaaactgtcaaggagccaaagtgtcaccttagagcaaaaacaaagccaggga 666

Query: 1128 aaagggagaaatcaaaaagcactctgggccagggtggcctcatgcataccaatgggtttt 1187  
||||||||||||||||||||| |||||||||||||||||||||||||||||  
Sbjct: 667 aaagggagaaatcaaaaagcactccgggccagggtggcctcatgcataccaatgggtttt 726

Query: 1188 gtcatttatggctgggcaagatttatgactcggcgccccaaagctgtaaacagagcacaa 1247  
||||||||||||||||||||| |||||||||||||||||||||||||||||  
Sbjct: 727 gtcatttatggctgggcaagatttatgactcggcgccccaaagctgtaaacagagcacaa 786

Query: 1248 aacagcaaacacttgctccttatggcatattgctgcggcgcaacttgaaagggggagccg 1307  
||||||||||||||||||||| ||| | ||||||||||||||||| |  
Sbjct: 787 aacagcaaacacttgctccttatggcatat---tgcaagcaacttgaaagggggagctg 843

Query: 1308 ggccccgcgtaggaggcaagagccggccgcaaagagccgctcagcggcattttgtcttcaa 1367  
| ||||||||| ||||| ||||||| | ||| || ||||||||| |||||  
Sbjct: 844 g--ccgcgtaggaggtgagagccagccgcaaaaatccgttcggcggcattttctcttcaa 901

Query: 1368 accggccgggtcggatgtggcatttgaagaaagaaggcgtgggtcaataatcaacccgca 1427  
||| ||| |||||||||||||||||||||||||||||||||||||  
Sbjct: 902 acccgccgggtcggatgtggcatttgaagaaagaaggcgtgggtcaataatcaacccgca 961

Query: 1428 ctttctcctccaaactgctgacgcga--ctcaccgccttctcagctaagccagctgcagg 1485  
||||||||||||||||||||| ||||||||||||||||||||| |||  
Sbjct: 962 ctttctcctccaaactgctgacgcgactctcaccgccttctcagctaagccagctgccgg 1021

Query: 1486 gaaggccagctctccgtgagaacct 1510  
||||||||||||||| |||||  
Sbjct: 1022 gaaggccagctctccgtaagaacct 1046

>NONMMUT056947.2  
NONCODE TRANSCRIPT ID [NONMMUT056947.2](#)  
NONCODE Gene ID [NONMMUG035351.2](#)  
Chromosome chr6  
Start Site 52175234  
End Site 52215076  
Strand +  
Exon Number 3  
CNCI Score -0.0679936  
Length 2207  
Assembly mm10  
Other transcript Versions [NONMMUT056947.1](#) (old version)

Query: 987 aagagagaaatggagcctttcgtgcaattccaaggtgtcaagggctcggcctcctcaaagg 1046  
||||||| ||||||||| ||| ||||| | ||| |||||  
Sbjct: 1633 aagagagaaaaggagcctttcgtgcaattccgaggcgtcaacgagggtccctc-tcaaagg 1691

Query: 1047 aaggtgttaaaaatataagtagtggtgtctaaactgtcaggagccaaagtgtcaccttag 1106  
||||||| ||||||||| ||| ||||||||| ||||||||| ||||||||| |||||||||  
Sbjct: 1692 aaggtgttaaaaatataagtagtatgtttaactgtcaggagccaaagtgtcaccttag 1751

Query: 1107 agcaaaaacaaagccaaggga-aaaggagaaatcaaaaa-gcactctgggccagggtgg 1164  
||||||| ||| ||||||||| ||||| |||||||||  
Sbjct: 1752 agcaaaaacaaagccaggggggaaaggagaaatcaaaaaagcactccgggccagggtgg 1811

Query: 1165 cctcatgcataccaatggttttgtcatttatggctgggcaagatttatgactcggcgcc 1224  
||||||| ||||||||| ||||||||| ||||||||| ||||||||| |||  
Sbjct: 1812 cctcatgcataccaatggttttgtcatttatggctgggcaagatttatgactcggctcc 1871

Query: 1225 ccaaagctgtaaacagagcacaaaacagcaaacacttgctccttatggcatattgctgcg 1284  
||||||| ||||||||| ||||||||| ||||||||| ||||| |||  
Sbjct: 1872 ccaaagctgtaaacagagcacaaaacagcaaacacttgctccttatggcagattgcagcg 1931

Query: 1285 gcgcaacttgaaagg-ggagccggggcccgcgtaggaggcaagagccggccgcaaagagc 1343  
||||||| ||||| || || ||||| ||||||||| |||  
Sbjct: 1932 gcgcaacttgaaagggaagagcccgggacgtgtaggaggtgagagccggccgcaa-atc 1990

Query: 1344 cgctcagcggcattttgtcttcaaaccggccgggtcggatgtggcatttgaagaaagaag 1403  
||||| || || ||| ||||||||| | ||||||||| ||||||||| |||||||||  
Sbjct: 1991 cgctcggccgctttttctcttcaaaccctcagggtcggatgtggcatttgaagaaagaag 2050

Query: 1404 gcgtgggtcaataatcaaccgcactttctcctccaaactgctgacgcga--ctcaccgc 1461  
||||||| ||||||||| ||||||||| ||||||||| |||||  
Sbjct: 2051 gcgtgggtcaataatcaaccgcactttctcctccaaactgctgacgcgactctcaccgc 2110

Query: 1462 cttctcagctaagccagctgcagggaaggcc 1492  
||||||| ||||||||| |||||||||  
Sbjct: 2111 cttctcagctaagccagctgcagggaaggcc 2141
